# Supplementary material for: Quality of fluid balance charting and interventions to improve it: a systematic review
Source: PubMed Central journal article supplement — BMJ Open Qual. 2023 Dec 13;12(4):e002260. doi: 10.1136/bmjoq-2023-002260 (PMC10729040; doi:10.1136/bmjoq-2023-002260), 2023-12-13
Supplement: bmjoq-2023-002260supp001.pdf [file bmjoq-2023-002260supp001.pdf]

## Search strategy

| Database                  | Keywords/search terms                                                                                                                                                                                                                                                                                                                                                                                                                                                                                                                                                                                                                                                                                                                                                                                                                                                                                                                                                                                                                                                                                                                                                                                                                                                                                                                  |
|---------------------------|----------------------------------------------------------------------------------------------------------------------------------------------------------------------------------------------------------------------------------------------------------------------------------------------------------------------------------------------------------------------------------------------------------------------------------------------------------------------------------------------------------------------------------------------------------------------------------------------------------------------------------------------------------------------------------------------------------------------------------------------------------------------------------------------------------------------------------------------------------------------------------------------------------------------------------------------------------------------------------------------------------------------------------------------------------------------------------------------------------------------------------------------------------------------------------------------------------------------------------------------------------------------------------------------------------------------------------------|
| <b>CINAHL (EBSCO)</b>     | <p>(MM "Fluid and Secretion") OR (MH "Fluid-Electrolyte Balance+") OR (MH "Fluid-Electrolyte Imbalance+") OR (MH "Fluid Intake-Output Measures") OR (MH "Fluid Therapy+") OR (MH "Fluid Intake") OR (MH "Hydration Status") OR (MH "Administration, Intravenous+") OR (MH "Infusions, Intravenous") OR (MH "Urine") OR (MH "Urinary Diversion+") OR (MH "Diuresis") OR diuresis OR "urine output" OR "urinary output" OR "urinary excretion" OR "frequency volume" OR "fluid administration" OR "fluid intake" OR "fluid balance"</p> <p>AND</p> <p>(MM "Documentation") OR (MH "Charting+") OR (MH "Medical Records+") OR (MH "Record review") OR (MH "Audit") OR (MH "Nursing Audit") OR (MM "Monitoring Physiologic") OR (MH "Intraoperative Monitoring+") OR (MH "Registration") OR (MH "Measurement Error+") OR recording OR charting OR monitoring OR documentation OR registration OR measuring OR AB measurement</p> <p>AND</p> <p>(MH "Quality of Health Care+") OR (MH "Quality of Care Research") OR (MH "Evaluation and Quality Improvement Program") OR (MH "Data Quality") OR (MH "Measurement Issues and Assessments+") OR quality OR completeness OR accuracy OR timeliness OR improvement OR improving OR improve</p>                                                                                                 |
| <b>MEDLINE via PubMed</b> | <p>((((((((((("Water-Electrolyte Imbalance"[Mesh]) OR ("Water-Electrolyte Balance"[Mesh]) OR ("Fluid Therapy"[Mesh]) OR ("Urine"[Mesh])) OR ("fluid balance"[Title/Abstract])) OR ("fluid intake"[Title/Abstract])) OR ("fluid administration" [Title/Abstract])) OR ("frequency volume" [Title/Abstract])) OR ("urinary excretion"[Title/Abstract])) OR ("urinary output" [Title/Abstract])) OR ("urine output" [Title/Abstract])) OR (diuresis[Title/Abstract]))</p> <p>AND</p> <p>((((((((((("Documentation"[Majr]) OR ("Data Collection"[Majr])) OR ("Nursing Records"[Mesh])) OR ("Medical records"[Mesh])) OR ("Monitoring, Physiologic"[Majr])) OR ("Weights and Measures"[Mesh])) OR (recording[Title/Abstract])) OR (charting[Title/Abstract])) OR (monitoring[Title/Abstract])) OR (documentation[Title/Abstract])) OR (registration[Title/Abstract])) OR (measuring[Title/Abstract])) OR (measurement[Title/Abstract]))</p> <p>AND</p> <p>((((((((((("Quality Control"[Mesh]) OR ("Nursing Audit"[Mesh])) OR ("Clinical Audit"[Mesh])) OR ("Quality Improvement"[Mesh])) OR ("Quality Indicators, Health Care"[Mesh])) OR ("Quality of Health Care" [Majr])) OR ("Data Accuracy" [Mesh])) OR ("Data Management [Mesh])) OR (quality[Title/Abstract])) OR (completeness[Title/Abstract])) OR (accuracy[Title/Abstract]))</p> |

|                                                                                              |                                                                                                                                                                                                                                                                                                                                                                                                                                                                                                                                                                                                                                                                                                                                                                                                                                                                                                                                                                                                                                                                             |
|----------------------------------------------------------------------------------------------|-----------------------------------------------------------------------------------------------------------------------------------------------------------------------------------------------------------------------------------------------------------------------------------------------------------------------------------------------------------------------------------------------------------------------------------------------------------------------------------------------------------------------------------------------------------------------------------------------------------------------------------------------------------------------------------------------------------------------------------------------------------------------------------------------------------------------------------------------------------------------------------------------------------------------------------------------------------------------------------------------------------------------------------------------------------------------------|
| <b>Embase</b>                                                                                | <p>exp fluid balance/ OR exp fluid intake/ OR exp fluid therapy/ OR exp urine volume/ OR urinary frequency/ OR urinary excretion/ OR fluid balance.ab,ti. OR fluid intake.ab,ti. OR fluid administration.ab,ti. OR frequency volume.ab,ti. OR urinary excretion.ab,ti. OR urinary output.ab,ti. OR urine output.ab,ti. OR diuresis.ab,ti.</p> <p>AND</p> <p>Medical record/ OR documentation/ OR medical record review/ OR monitoring/ OR patient monitoring/ OR physiologic monitoring/ OR measurement/ OR measurement accuracy/ OR measurement error/ OR measurement precision/ OR recording.ab,ti. OR charting.ab,ti. OR monitoring.ab,ti. OR documentation.ab,ti. OR registration.ab,ti. OR measuring.ab,ti. OR measurement.ab,ti.</p> <p>AND</p> <p>quality of nursing care/ OR data quality/ OR quality control/ OR quality improvement study/ OR health care quality/ Or data accuracy/ OR accuracy/ OR timeliness/ OR data completeness/ OR quality.ab,ti. OR completeness.ab,ti. OR accuracy.ab,ti. OR timeliness.ab,ti. OR improving.ab,ti. OR improve.ab,ti.</p> |
| <p><b>Cochrane Library</b></p> <p>[MeSH descriptor] explode all trees</p> <p>"free text"</p> | <p>[Water-Electrolyte Balance] OR [Water-Electrolyte Imbalance] OR [Fluid Therapy] OR [Fluids and Secretions] OR [Diuresis] OR [Urine] OR [Infusions, Intravenous] OR "fluid balance" OR "fluid intake" OR "fluid administration" OR "frequency volume" OR "urinary excretion" OR "urinary output" OR "urine output" OR "diuresis"</p> <p>AND</p> <p>[Data Accuracy] OR [Nursing Records] OR [Medical Records] OR [Data Collection] OR [Hospital Records] OR [Chart] OR [Monitoring, Physiologic] OR [Documentation] OR [Dimensional Measurement Accuracy] OR recording OR charting OR monitor OR monitoring OR documentation OR registration OR measure OR measuring OR measurement</p> <p>AND</p> <p>[Quality Control] OR [Quality Improvement] OR [Quality Assurance, Health Care] OR [Quality of Health Care] OR [Quality Indicators, Health Care] OR quality OR completeness OR accuracy OR timeliness OR improvement OR improving OR improve</p>                                                                                                                      |

All searches have subsequently been limited to the period from January 2010.
